# Supplementary material
Source: HighWire-hosted journal article supplement (https://thorax.bmj.com/content/78/5/523)
Supplement: inline-supplementary-material-1 [file inline-supplementary-material-1.pdf]

HOT-HMV HE

Murphy et al

## Online supplement: Cost-Effectiveness of Home Non-Invasive Ventilation in patients with persistent hypercapnia after an acute exacerbation of COPD

Patrick B Murphy PhD<sup>1,2</sup>; Bernd Brueggenjuergen MD, MPH<sup>3</sup>; Thomas Reinhold PhD<sup>4</sup>; Qing Gu MB, MPH<sup>5</sup>; Lauren B Fusfeld MBA<sup>5</sup>; Gerard J Criner MD, FACP, FACCP<sup>6</sup>; Thomas F Goss, PharmD<sup>5</sup>; Nicholas Hart PhD<sup>1,2</sup>  
Lane Fox Unit, Guy's & St Thomas' NHS Foundation Trust, London, UK

Centre for Human Aerospace and Physiological Science, King's College, London, UK

Institute for Health Economics, Steinbeis University Berlin, Berlin, GERMANY

Institute for Social Medicine, Epidemiology and Health Economics, Charité - Universitätsmedizin Berlin, Berlin, GERMANY

Boston Healthcare Associates, Inc., Boston, MA, USA

Lewis Katz School of Medicine, Temple University, Philadelphia, PA, USA

Corresponding Author

Dr. Patrick B Murphy

Lane Fox Respiratory Unit, St Thomas' Hospital, Westminster Bridge Road, London, SE1 7EH, UK

Email: patrick.murphy@gstt.nhs.uk

Tel: +44 (0) 2071888070

This online-only supplement contains:

**2 eMETHOD:** 1) Calculation of QALY; 2) US specific analysis

**2 eRESULTS:** 1) US specific analysis; 2) Per protocol analysis for UK & US

**1 eDISCUSSION:** 1) review of alternative readmission avoidance in COPD

**3 eTABLES:** 1) Unit costs for treatments and medications; 2) Baseline clinical data for randomized patients; 3) Participant retention in clinical trial by assessment date; 4) Cost-effectiveness results for home non-invasive ventilation with home oxygen therapy vs. home oxygen therapy alone in US – intention to treat and per protocol analysis

**2 eFIGURES:** 1) Participant Flow Diagram – per protocol analysis; 2) One-way sensitivity analysis results of home non-invasive ventilation with home oxygen therapy vs home oxygen therapy alone in the US health systems (intention-to-treat); 3) Cost-effectiveness plane for home non-invasive ventilation with home oxygen therapy vs home oxygen therapy alone in the US health systems (intention-to-treat)

HOT-HMV HE

Murphy et al

**eMETHOD****Trial design and patients**

A full description of the trial design of the base case can be found with the efficacy results of the clinical trial along with a copy of the trial protocol including a priori end points and statistical analysis plan.[1] In brief the trial was a UK based open-label, parallel-group randomised clinical trial with a 1:1 allocation of home oxygen therapy (HOT) alone or home mechanical ventilation (HMV) with HOT. Adult subjects hospitalised with a hypercapnic exacerbation of COPD requiring acute non-invasive ventilation were screened for eligibility at least 2 weeks after resolution of decompensated acidosis (arterial pH > 7.30) and within 4 weeks of attaining clinical stability. Patients with persistent hypercapnia ( $\text{PaCO}_2 \geq 7\text{kPa}$ ) without evidence of clinically significant sleep apnoea were then randomised to HOT alone or HOT-HMV. Medical resource use was recorded as part of the original randomised clinical trial with the cost-effectiveness analysis conducted exclusively from these data. Study visits or other trial-related medical resource use subsequent to the initial randomisation visit were excluded from the medical resource use data.

**Intervention**

All patients had the medical management of their COPD optimised as per British Thoracic Society (BTS) guidelines.[2] Oxygen therapy was titrated to the lowest flow rate to achieve  $\text{PaO}_2 > 8\text{kPa}$  in all patients. If achieving a  $\text{PaO}_2 > 8\text{kPa}$  resulted in decompensation of respiratory acidosis (defined  $\text{pH} < 7.30$ ) then the highest flow rate that did not lead to decompensation was delivered. Patients randomised to HMV had an additional night stay for overnight titration of NIV to ameliorate nocturnal hypoventilation. HMV was delivered using a bilevel ventilator designed for home non-invasive ventilation and was used with an appropriate interface to maximise patient comfort. Patients allocated to HOT alone could receive acute non-invasive ventilation (NIV) during hospital readmissions for decompensated respiratory failure.

**Calculation of QALY**

The EQ-5D-5L was used to estimate quality of life.[3] Quality-adjusted life years (QALYs) were used to estimate the time patients spent at specific levels of health status with a value of 1 representing 12 months of perfect health and 0 death.[4] To calculate QALYs an EQ-5D-5L index score was calculated for each of these time points based on the EQ-5D-5L index calculator.[5] UK-specific and US-specific index scores were used as appropriate and are based on general population valuation surveys that used time trade-off (TTO) methods.[6, 7] In the case of missing in-between EQ-5D-5L index scores, a linear change was assumed between the follow-up time points and a replacement by means of prior and post missing values was imputed. For patients who died during study follow-up with missing data a conservative approach was adopted with the final EQ-5D-5L score was imputed as 0. QALYs were calculated at the individual patient level by adopting the area under the curve method.[7, 8]

**Medical resource use**

Individual patient data recording exacerbation-related hospitalisations and outpatient contacts, as well as self-treated exacerbations were collected by study sites contemporaneously at pre-specified trial follow up. Additionally, patient-reported medication changes and the number of primary/secondary care visits were recorded using patient diaries, which were reviewed at each patient follow up. Patients continued to complete the diaries until trial completion or withdrawal, irrespective of whether they had met the primary outcome or not. All collected data were included in the analysis until the time of trial

HOT-HMV HE

Murphy et al

completion, withdrawal or death. To avoid over-counting physician visits, the patient-reported number of primary/secondary care visits was reduced by the documented number of physician-treated exacerbations for the same time period.

### **Economic outcomes and assessments**

The economic analysis was conducted over a 12-month time horizon to reflect the data collection period of the clinical trial. All resource consumption units were multiplied by standardised 2017 UK unit costs (eTable1a) from a National Health Service perspective. The associated tariff for the recorded contact was used with the cause of hospitalisation referenced to the appropriate organisation costing for that diagnosis; primary care visits were costed at a standard rate irrespective of cause of contact. Costs of medications associated with the management of acute exacerbations were included based on standard regimens. For patients with missing diaries, missing costs have been imputed by group averages. Total device costs were based on costs of the HMV device, diagnostic tests, titration and oxygen supply. Patients receiving HMV were assumed to require an additional inpatient day for titration in the UK analysis. Since the oxygen therapy flow rates were comparable in both treatment arms, monthly cost of HOT was considered to be equivalent between groups. In the UK, device costs (oxygen concentrators and HMV devices, including maintenance and support) were included as a one-time cost at the beginning of the treatment period based on a standardized cost of £4,900 for the first 12 months, with set-up included.

#### US economic analysis

All resource consumption units were multiplied by standardised 2017 US unit costs from a US Medicare payer (eTable 1b). Costs of medications associated with the management of acute exacerbations were included based on standard regimens. Total device costs were based on costs of the HMV device, diagnostic tests, titration and oxygen supply. Patients receiving HMV were assumed to have a split night study (diagnostic and titration) in the US analysis, in keeping with current practice (communicated by author GC). Device costs (oxygen concentrators and HMV devices, including maintenance and support) in the US were calculated monthly based on the actual period of device use.

### **Statistical analysis plan**

The UK based cost-effectiveness analysis was an *a priori* secondary outcome contained within the original randomised clinical trial statistical analysis plan. The primary cost-effectiveness analysis was based on the intention-to-treat (ITT) approach, including all available data for patients randomised to initially allocated therapy irrespective of compliance or subsequent addition of HMV. The US cost-effectiveness analysis was not specified in the original trial protocol but was added following completion of the clinical trial but prior to the UK economic analysis being conducted. The final statistical analysis plan was completed to account for UK and US systems using an intention-to-treat and per protocol analysis strategy.

The trial protocol allowed the addition of HMV to patients in the control arm due to both ethical and clinical concerns. The pre-specified criteria are provided in the clinical publication.[1] In line with the clinical trial, a per protocol analysis was performed to account for this aspect of trial design. The per protocol design included all patients allocated to intervention from the point of receiving the trial intervention until either trial withdrawal (both groups) or addition of home non-invasive ventilation to clinical care (HOT alone group), at which point data were censored.

HOT-HMV HE

Murphy et al

All individual costs during the protocol-conforming treatment duration were extrapolated to the time period between crossover and the end of follow-up. To align with the conservative approach of this analysis, QALYs of crossover patients were taken as documented without data censoring.

All economic analyses reported were performed using MS Excel 2010 (Microsoft, Washington, USA).

The incremental cost-effectiveness ratio (ICER) was calculated as the incremental change in costs divided by the incremental change in QALYs (ICER = [Total cost of intervention - Total cost of control] / [QALYs with intervention - QALYs with control]). The willingness to pay thresholds were set at £30,000/QALY in the UK,[9] whereas no threshold was set for the US given the lack of consensus on a cost-effectiveness threshold in that country.

### Sensitivity analyses

To account for uncertainty in the cost assumptions, a one-way sensitivity analysis was conducted by varying base-case unit costs within realistic minimum-maximum ranges (eTable 1). The resulting changes in the ICER compared to the base-case ICER were summarized in a tornado diagram.

Additionally, non-parametric bootstrapping was used to estimate the variability around the arithmetic mean of the base case results.[10] Bootstrapping was performed separately for each treatment allocation and in line with the recommendations from Drummond *et al.*[11] Bootstrapped samples were also used to generate cost-effectiveness acceptability curves, which show the probability of cost-effectiveness with regard to the willingness to pay for one extra QALY.

### eResults

#### Clinical efficacy

The median time to readmission or death was 4.3 months in the intervention group versus 1.4 months in the control group. Risk of readmission or death was significantly reduced (adjusted HR 0.49, 95%CI 0.31 to 0.77, p=0.002; unadjusted HR 0.54, 95%CI 0.34 to 0.84, p=0.007). The hazard ratio was adjusted for the number of COPD admissions in previous year, prior use of long term oxygen therapy (LTOT), age and BMI. At 12 months, 16 patients had died in the intervention group versus 19 in the control group.[1]

#### Base-case analyses for US (ITT)

Total average annual device costs per patient were \$4,298 in the intervention group compared with \$1,582 in the control group. For the patients in the intervention group, average annual total primary/secondary physician visit costs per patient were \$10,805 compared with \$15,033 in the control group; similarly, average annual medication costs per patient were \$758 and \$1,087 for the intervention group and control group, respectively. The average annual total costs per patient for the treatment of exacerbations were \$8,598 in the intervention group compared with \$10,683 in the control group. The total direct costs per patient were \$24,458 (95%CI, \$18,824 to \$30,092) for the intervention group and \$28,386 (95%CI, \$22,149 to \$34,624) for the control group. The average number of QALYs was 0.49 (0.41 to 0.57) and 0.41 (0.33 to 0.49) for the intervention group and control group, respectively. These estimates resulted in an ICER of -\$50,856, suggesting HMV with HOT is dominant, being more effective and less costly compared with HOT alone (eTable 4).

#### One-way sensitivity analyses and bootstrap sensitivity analyses for US (ITT)

HOT-HMV HE

Murphy et al

One-way sensitivity analyses identified the input parameters with the largest impact on the ICER in the US: cost per additional primary/secondary physician visit (95%CI -\$61,804 to \$39,906), non-invasive device costs (95%CI -\$56,536 to -\$45,174) and hospital admission costs (95%CI -\$56,274 to -\$45,216) (eFigure 2).

The bootstrap sensitivity analysis indicated that at a threshold of \$50,000/QALY the probability that HMV with HOT is cost-effective compared to HOT alone is 94%. The probability that HMV with HOT is less costly and more effective is 76% and the probability that HMV with HOT is costlier and more effective than HOT is 14% (eFigure 3).

#### Per protocol analysis for UK

A total of 110 patients were included in the per protocol analysis: 56 in the HOT with HMV group and 54 in the HOT alone group. The total direct costs were £20,713 (95%CI, £14,602 to £26,823) per patient for the intervention group and £19,396 (95%CI, £14,162 to £24,630) per patient for the control group. The average quality-adjusted life years were 0.36 and 0.32 for the intervention group and control group, respectively. These estimates resulted in an incremental cost-effectiveness ratio of £34,004/QALY.

#### Per protocol analysis for US

The total direct costs were \$30,550 (95%CI, \$19,298 to \$41,803) for the intervention group and \$34,563 (95%CI, \$24,994 to \$44,133) for the control group. The average QALYs were 0.49 and 0.42 for the intervention group and control group, respectively. With these figures, the incremental cost-effectiveness ratio was -\$59,096/QALY, suggesting HMV with HOT was dominant (more effective and less costly) compared with HOT alone (eTable 4).

### eDiscussion

#### Cost differences between UK and US models

In both the UK and US models, the HMV device cost was the major driver of the ICER. Thus, the difference in the ICER between the US and UK systems was accounted for largely by differences in charging for the HMV setup and package of care. The UK model used a single upfront charge for the device, consumables (mask, ventilator tubing), titration and 12 months of 24-hour-per-day medical, technical and nursing support. The UK upfront cost was not commuted if the patient discontinued non-invasive ventilation during the trial period, whereas the US system adopts a monthly charge for support with a lower upfront cost for device setup. Consequently, there were higher device costs in the UK compared with the US model within the ITT analysis in patients who withdrew or discontinued therapy after randomization. The UK base case analysis result is particularly sensitive to the cost of the HMV package of care. Varying the HMV package of care for 12 months by  $\pm 20\%$  (£4,000, £6,000) has a large impact on the ICER (-£2,244 to £25,542). Consequently, in the UK improved cost-effectiveness could be achieved with a small change in initial setup costs, achieved by renting or recycling equipment and/or by using outpatient rather than inpatient titration. In addition, the trial design limited the cost estimates to a 12-month timeframe. Within the UK system a lower charge is levied for subsequent years of follow up as the device cost is not renewed and therefore the 3- or 5-year cost per QALY may be reduced with longer-term data.

In the UK, the average cost savings associated with reduced exacerbations was £1,141, which mainly arose from reduced hospitalizations (£1,166). The cost savings attributed to reductions in patient-

HOT-HMV HE

Murphy et al

reported medication and outpatient costs was £2,342, 99% of which is derived from reduced primary/secondary care visits. The one-way sensitivity analysis of the US model indicated a greater impact on ICER of variation in costs of primary/secondary care visits.

#### Limitation of US analysis

A major limitation of the US analysis is that the model is based on clinical data from a UK trial. To reflect medical resource use in the US, the data were further adjusted to reflect real-world clinical practice in several ways: (1) patients in the intervention group were assumed to have a separate outpatient visit for titration in US as opposed to one additional inpatient day in UK and (2) medication usage was verified by a US clinical expert (*Author GC*). In addition, quality-of-life values in the US were calculated by applying the US-specific index to the EQ-5D-5L values collected from the British patient population. Furthermore, the infrastructure in the US is less well adapted for HMV and as such the modelling is highly speculative and should be viewed with caution.

#### Other admission reduction strategies

Pulmonary rehabilitation is an evidence based intervention that improves quality of life, reduces exacerbations and is recommended following exacerbations in patients with COPD.[12] It can be delivered following an acute exacerbation with small and large trial data suggesting clinical benefits.[13, 14] The efficacy of pulmonary rehabilitation in patients with severe breathlessness is unclear. In the trial by Eaton *et al.*, the mean mMRC dyspnea score was  $2.3 \pm 1.2$  compared to a median MRC score of 5 (range 4-5) in the patient population providing the data for the economic analysis.[14] The increased severity of dyspnea in the cohort of patients following life-threatening exacerbations questions the feasibility of pulmonary rehabilitation, reducing the applicability. Non-invasive ventilation (NIV) has been used to facilitate engagement and enhance long-term benefits of pulmonary rehabilitation in the subgroup of stable COPD patients with chronic respiratory failure.[15] It would not have been appropriate to utilize NIV to support pulmonary rehabilitation in these patients as this was the intervention under examination. In addition to the lack of data demonstrating efficacy in the more severe patient population studied, evidence shows that access to pulmonary rehabilitation can be limited by many factors (including patient engagement), leading to fewer than 10% of suitable patients completing therapy.[16] Despite these limitations and challenges, pulmonary rehabilitation has been incorporated into national and international guidelines for patients following acute exacerbations of COPD.[12]

In addition to the physiological burden of COPD, there is a clear psychological burden with high levels of anxiety and depression reported in patients with COPD.[17] These factors may influence readmission and interactions with health care providers. Cognitive behavioral therapy (CBT) is an evidence-based intervention for anxiety and has been used in patients with COPD in an attempt to reduce readmissions. Data show that the use of CBT in patients at high risk of exacerbations of COPD reduces admission rates and is cost-effective.[18] The study from Marshall *et al.* has many strengths and enrolled across the severity spectrum of COPD, including high levels of patients with severe dyspnea (47% MRC 5), but in comparison to the cohort of post life-threatening exacerbations included in our data, Marshall *et al.*'s study has fewer patients with severe airflow obstruction (22% GOLD IV compared with >50% in our cohort) and reports no measure of respiratory failure. Consequently, the applicability to those patients with established respiratory failure and a recent life-threatening exacerbation requires further

HOT-HMV HE

Murphy et al

investigation, as in this group readmission may be driven by more frail physiological factors less amenable to change with a psychological intervention.

#### Cost-effectiveness of other exacerbation reduction strategies in COPD

Exacerbations are an important event in the natural history of COPD and are associated with both short- and long-term harm. Exacerbations are associated with increased mortality,[19] more rapid progression of airflow obstruction,[20] decreased physical activity,[21] worse quality of life[22] and further exacerbations.[23] Exacerbations, therefore, represent an important time to intervene in patient care and improve outcomes. Additionally, they are recognized as important by patients themselves and so represent a target with relevance for the health system, clinicians and patients.

Patients with more severe exacerbations are at higher risk of readmission and clinical scoring,[24] and physiological scoring systems [25, 26] have been used to identify individuals at higher risk of readmission and therefore target readmission prevention. However, these systems are most effective at identifying patients at low risk of readmission who can access lower levels of support and are less sensitive at identifying those at high risk of readmission. Furthermore, there is evidence that some of the readmission risk is related to the structure of delivery of care,[27] with readmission rates across diseases correlating within hospitals but being unrelated to surgical readmission performance. Attempts have been made to standardise care using simple care bundles[28] as well as more complex interventions.[29] Whilst simple care bundles are cheap to implement (<£50 per patient) the reported clinical impact varies with much data being at risk of bias.[28, 30] The data are equivocal on the clinical outcome and cost-effectiveness of these interventions, with higher uncertainty in patients with more severe disease and with potential safety concerns following greater emphasis on self-management.[31-33] All patients recruited for the clinical trial that provided data for this economic analysis had severe disease, indicating the standard interventions above may not be applicable. The patients were all managed in line with the BTS guidance which incorporates self-management plans, optimization of pharmacotherapy and discharge bundles.

Incorporated into discharge bundles within UK practice is referral for pulmonary rehabilitation. Whilst rehabilitation is important, trials demonstrating efficacy of rehabilitation have included patients with lower levels of dyspnoea than in the population in this study.[34] Additionally strategies to improve acceptance of rehabilitation in patients with chronic respiratory failure have involved use of non-invasive mechanical ventilation, which would have been impossible in the trial design as this was the intervention under assessment.[15, 35] However, modelling of pulmonary rehabilitation after an acute exacerbation does indicate that this is a cost-effective strategy with a potential net saving (\$5721, 95%CI \$3307 to \$8388) to the health system.[36]

Readmission is a multifactorial process, and both physiological and psychological factors can influence the outcome. A cognitive behavioural therapy intervention may reduce hospital readmission in patients with COPD and co-morbid anxiety.[18] Similar to other post-exacerbation work described above, the patient cohort studied here was not selected immediately following an exacerbation and differs in terms of breathlessness and disease severity from the patients studied in the HOT-HMV trial; therefore the applicability of CBT as an intervention in this group with severe COPD and respiratory failure is unclear. Heslop-Marshall *et al.* also report readmission but not exacerbations, and it is not clear if admission avoidance occurred without a reduction of exacerbations.[18] However, the data still indicate that CBT would be a cost-effective strategy with 100% probability of being cost-effective compared to standard leaflets at a value of greater than £5000.

HOT-HMV HE

Murphy et al

#### Limitation of clinical trial

Although the use of an open label trial design is a potential criticism of the previously published study, this trial was similar in approach compared with other HMV trials.[37-40] Indeed, the use of a sham device is associated with a number of clinical and ethical considerations, which limit the use of a sham device in a clinical trial involving patients with chronic respiratory failure.[41-44]

Imputation was used due to the presence of missing values in the dataset. These values were imputed using a simple averaging method. Because of the small sample size involved, a more complex system of imputation was not felt appropriate as the validity of the model could not be guaranteed. Although there was a numerical difference in the missing data between interventions, this difference was not significant for either trial visits ( $p=0.10$ ) or diary completion ( $p=0.07$ ). Because of the lack of significant differences in baseline demographic and clinical values at randomisation, the final analysis was not further adjusted, with the exception of the change in patient-reported utility scores, which were adjusted as a change from baseline score.



HOT-HMV HE

Murphy et al

**eFigures**

eFigure e1: Patient flow diagram demonstrating recruitment and retention in original clinical trial

eFigure e2: One-way sensitivity analysis results of home non-invasive ventilation with home oxygen therapy vs home oxygen therapy alone in the US health systems (intention-to-treat)

eFigure e3: Cost-effectiveness plane for home non-invasive ventilation with home oxygen therapy vs home oxygen therapy alone in the US health systems (intention-to-treat)

HOT-HMV HE

Murphy et al

**eTables***eTable 1a Unit costs for treatments and medications (UK)*

| Resource unit                                               | Unit cost (DSA range)                        | Source                                                                                                      |
|-------------------------------------------------------------|----------------------------------------------|-------------------------------------------------------------------------------------------------------------|
| 2017 UK unit cost                                           |                                              |                                                                                                             |
| Home non-invasive ventilation package of care for 12 months | £4,900.00 (£4,000.00-£6,000.00) <sup>a</sup> | NHS commissioned cost at Lane Fox Unit                                                                      |
| Additional bed day for titrating non-invasive ventilation   | £540.00 (£432.00-648.00) <sup>a</sup>        | NHS tariff [45]                                                                                             |
| Oxygen supply per month                                     | £83.53 (£66.82-£100.23) <sup>a</sup>         | Trial data, and published cylinder costs [46, 47]                                                           |
| Hospitalization due to exacerbation                         | £3,254.00 (£2,401.00-£3,687.00) <sup>b</sup> | NHS tariff code DZ21J [48]                                                                                  |
| Physician contact due to exacerbation                       | £63.59 (£50.87-£76.31) <sup>a</sup>          | Unit Costs of Health and Social Care 2016, PSSRU 2016 [49]                                                  |
| Self-treated exacerbation                                   | £7.89 (£6.31 -£9.47) <sup>a</sup>            | Assumption of 10 days increased steroid inhaler usage - Wedzicha 2017 Management of COPD exacerbations [50] |
| Increased steroid inhaler usage per day                     | £0.79 (£0.63-£0.95) <sup>a</sup>             | Calculation based on AMENDMENTS TO THE DRUG TARIFF August 2017 [51]                                         |
| Increased reliever inhaler usage per day                    | £2.53 (£2.02-£3.04) <sup>a</sup>             | Calculation based on AMENDMENTS TO THE DRUG TARIFF August 2017 [51]                                         |
| Steroid tablets per day                                     | £0.25 (£0.20-£0.30) <sup>a</sup>             | Calculation based on AMENDMENTS TO THE DRUG TARIFF August 2017 [51]                                         |
| Antibiotic treatment per day:                               |                                              | Calculation based on AMENDMENTS TO THE DRUG TARIFF August 2017 [51]                                         |
| Amoxicillin                                                 | £1.66                                        |                                                                                                             |
| Amoxiclav (clavulan acid)                                   | £0.58                                        |                                                                                                             |
| Azithromycin                                                | £0.36                                        |                                                                                                             |
| Benzylpenicillin                                            | £5.46                                        |                                                                                                             |
| Cefaclor                                                    | £1.07                                        |                                                                                                             |
| Ciprofloxacin                                               | £2.55                                        |                                                                                                             |
| Clarithromycin                                              | £1.92                                        |                                                                                                             |
| Co-Amoxiclav                                                | £5.18                                        |                                                                                                             |
| Doxycycline                                                 | £0.20                                        |                                                                                                             |
| Erythromycin                                                | £1.54                                        |                                                                                                             |
| Flucloxacillin                                              | £1.14                                        |                                                                                                             |

HOT-HMV HE

Murphy et al

| Resource unit                            | Unit cost (DSA range)                         | Source                                                                 |
|------------------------------------------|-----------------------------------------------|------------------------------------------------------------------------|
| Metronidazole                            | £3.60                                         |                                                                        |
| Tazocin                                  | £52.20                                        |                                                                        |
| Tetracycline                             | £0.26                                         |                                                                        |
| Trimethoprim                             | £0.12                                         |                                                                        |
| Additional primary/secondary care visits | £1,659.00 (£1,327.20-\$1,990.80) <sup>a</sup> | NHS[48] and Unit Costs of Health and Social Care 2016, PSSRU 2016 [49] |

*eTable 1b Unit costs for treatments and medications (US)*

| 2017 US unit cost                                   |                                              |                                                                                                                                    |
|-----------------------------------------------------|----------------------------------------------|------------------------------------------------------------------------------------------------------------------------------------|
| Home non-invasive ventilation device cost per month | \$270.13 (\$253.29-\$286.96) <sup>c</sup>    | CMS DMEPOS Fee Schedule 2017 HCPCS code E0471 [52]                                                                                 |
| Diagnostic test cost (excluding titration)          | \$171.91 (\$137.53-\$206.29) <sup>a</sup>    | CMS Physician Fee Schedule 2017 CPT code 95806 [53]                                                                                |
| Titration cost                                      | \$471.58 (\$377.26-\$565.89) <sup>a</sup>    | CMS Physician Fee Schedule 2017 CPT code 95807 [53]                                                                                |
| Oxygen supply per month                             | \$71.85 (\$66.53-\$77.16) <sup>c</sup>       | CMS DMEPOS Fee Schedule 2017 HCPCS code E1390 [52]                                                                                 |
| Hospitalization due to exacerbation                 | \$5,977.69(\$4763.00-\$7145.00) <sup>a</sup> | DRG Summary for Medicare Inpatient Prospective Payment Hospitals DRG code 191 FY 2015 [54], inflated to 2017 USD using US CPI [55] |
| Physician fee due to exacerbation                   | \$44.14 (\$35.31-\$52.97) <sup>a</sup>       | CMS Physician Fee Schedule 2017 CPT code 99212 [53]                                                                                |
| Self-treated exacerbation                           | \$137.10 (\$109.68-\$164.52) <sup>a</sup>    | Assumption of 10 days increased steroid inhaler usage - Wedzicha 2017 Management of COPD exacerbations [50]                        |
| Steroid inhaler usage per day                       | \$63.04 (\$50.43-\$75.64) <sup>a</sup>       | Calculated based on WAC price [56] and Pulmicort Flexhaler inhalation powder dosing information [57]                               |
| Reliever inhaler usage per day                      | \$5.14 (\$4.12-\$6.17) <sup>a</sup>          | Calculated based on WAC price [56] and Symbicort dosing information provided by clinical expert                                    |
| Steroid tablets per day                             | \$13.71 (\$10.97-\$16.45) <sup>a</sup>       | Calculated based on WAC price [56] and Prednisone dosing information [58]                                                          |
| Antibiotic treatment per day:                       |                                              |                                                                                                                                    |
| Amoxicillin                                         | \$3.49                                       | WAC price [56], Gillisen 2007 [59]                                                                                                 |

HOT-HMV HE

Murphy et al

|                                          |                                              |                                                                                                       |
|------------------------------------------|----------------------------------------------|-------------------------------------------------------------------------------------------------------|
| Amoxiclav (clavulan acid)                | \$7.00                                       | WAC price [56], Augmentin dosing information [60]                                                     |
| Azithromycin                             | \$8.79                                       | WAC price [56], Gillisen 2007 [59]                                                                    |
| Benzympenicillin                         | \$354.41                                     | WAC price [56], Benzympenicillin dosing information [61]                                              |
| Cefaclor                                 | \$45.68                                      | WAC price [56], Cefaclor dosing information [62]                                                      |
| Ciprofloxacin                            | \$2.97                                       | WAC price [56], Gillisen 2007 [59]                                                                    |
| Clarithromycin                           | \$8.79                                       | WAC price [56], Clarithromycin dosing information [63]                                                |
| Doxycycline                              | \$0.67                                       | WAC price [56], Gillisen 2007 [59]                                                                    |
| Erythromycin                             | \$445.68                                     | WAC price [56], Erythromycin dosing information [64]                                                  |
| Flucloxacillin                           | \$67.13                                      | WAC price [56], Flucloxacillin dosing information [65]                                                |
| Metronidazole                            | \$5.18                                       | WAC price [56], Metronidazole dosing information [66]                                                 |
| Tazocin                                  | \$264.60                                     | WAC price [56], Tazocin dosing information [67]                                                       |
| Tetracycline                             | \$2.54                                       | WAC price [56], Tetracycline dosing information [68]                                                  |
| Trimethoprim                             | \$8.55                                       | WAC price [56], Trimethoprim dosing information [69]                                                  |
| Additional primary/secondary care visits | \$3014.00 (\$2411.20-\$3616.80) <sup>b</sup> | Calculated based on average of cost of hospitalization and physician fee due to exacerbation [53, 54] |

Abbreviation: DSA=deterministic sensitivity analysis; NHS= National Health Service; PSSRU=personal social services research unit; COPD=chronic obstructive pulmonary disease; CMS=Centers for Medicare and Medicaid services; DMEPOS= durable medical equipment, prosthetics, orthotics, and supplies; DRG= Diagnosis-related group; CPI=consumer price index; WAC=wholesale acquisition cost;

a. Varied by  $\pm$  20%

b. Upper and lower bound obtained from NHS national tariff

c. Upper and lower bound obtained from CMS DMEPOS Fee Schedule 2017

eTable 2: Baseline patient data by treatment allocation

| Baseline characteristics                                     | HOT HMV (N=57)      | HOT (N=59)          | Total (N=116)       | P-value |
|--------------------------------------------------------------|---------------------|---------------------|---------------------|---------|
| *Age (years) <sup>1</sup>                                    | 66.4 (10.2)         | 67.1 (9.0)          | 66.7 (9.6)          | 0.675   |
| *Median BMI (kg/m <sup>2</sup> ) <sup>2</sup>                | 21.5 (18.8 to 24.5) | 22.2 (17.9 to 26.9) | 21.6 (18.2 to 26.1) | 0.776   |
| *Prior use of LTOT (n (%)) <sup>3</sup>                      | 40 (70%)            | 40 (68%)            | 80                  | 0.782   |
| * $\geq$ 3 COPD related admissions in last year <sup>3</sup> | 30 (53%)            | 31 (53%)            | 61                  | 0.992   |
| Gender (female) (n (%)) <sup>3</sup>                         | 29 (51%)            | 32 (54%)            | 61                  | 0.717   |

HOT-HMV HE

Murphy et al

|                                               |                      |                      |                      |       |
|-----------------------------------------------|----------------------|----------------------|----------------------|-------|
| Median smoking pack year history <sup>2</sup> | 42.0 (30.5 to 60.0)  | 45.0 (31.0 to 55.0)  | 44.0 (31.0 to 60.0)  | 0.691 |
| Median AHI (/hr) <sup>2</sup>                 | 2.4 (0.9 to 6.2)     | 2.0 (0.8 to 3.9)     | 2.2 (0.8 to 5.1)     | 0.509 |
| Median neck circumference (cm) <sup>2</sup>   | 36.3 (33.0 to 40.0)  | 38.6 (35.3 to 41.0)  | 37.0 (34.5 to 40.0)  | 0.084 |
| Median waist circumference (cm) <sup>2</sup>  | 90.0 (78.0 to 100.5) | 87.5 (78.0 to 106.0) | 88.0 (78.0 to 102.0) | 0.706 |
| FEV <sub>1</sub> <sup>1</sup>                 | 0.6 (0.2)            | 0.6 (0.2)            | 0.6 (0.2)            | 0.491 |
| FEV <sub>1</sub> (%) <sup>1</sup>             | 24.0 (8.6)           | 22.9 (8.6)           | 23.4 (8.6)           | 0.494 |
| FVC <sup>1</sup>                              | 1.8 (0.8)            | 1.5 (0.6)            | 1.7 (0.7)            | 0.091 |
| FVC (%) <sup>1</sup>                          | 57.4 (19.7)          | 49.3 (20.4)          | 53.2 (20.4)          | 0.034 |
| FEV <sub>1</sub> /FVC <sup>1</sup>            | 0.3 (0.1)            | 0.4 (0.1)            | 0.4 (0.1)            | 0.088 |
| Median LTOT prescription <sup>2</sup>         | 1.0 (0.5 to 1.5)     | 1.0 (0.5 to 2.0)     | 1.0 (0.5 to 2.0)     | 0.113 |
| Median IPAP (cmH <sub>2</sub> O) <sup>2</sup> | 24.0 (22.0 to 26.0)  | NA                   | 24.0 (22.0 to 26.0)  | NA    |
| Median EPAP (cmH <sub>2</sub> O) <sup>2</sup> | 4.0 (4.0 to 5.0)     | NA                   | 4.0 (4.0 to 5.0)     | NA    |
| Median back up rate (bpm) <sup>2</sup>        | 14.0 (14.0 to 16.0)  | NA                   | 14.0 (14.0 to 16.0)  | NA    |
| PaO <sub>2</sub> on room air <sup>1</sup>     | 6.4 (1.2)            | 6.4 (1.1)            | 6.4 (1.1)            | 0.823 |
| PaCO <sub>2</sub> on room air <sup>1</sup>    | 7.9 (0.9)            | 7.9 (0.9)            | 7.9 (0.9)            | 0.938 |
| <sup>†</sup> Median SGRQ summary <sup>2</sup> | 74.7 (63.7 to 81.7)  | 71.0 (62.6 to 78.6)  | 73.8 (63.3 to 80.3)  | 0.193 |
| <sup>††</sup> SRI summary <sup>1</sup>        | 45.8 (15.0)          | 46.9 (15.6)          | 46.4 (15.2)          | 0.703 |
| <sup>†††</sup> EQ-5D-5L                       | 0.36 (0.35)          | 0.42 (0.30)          | 0.39 (0.33)          | 0.338 |
| Median MRC dyspnoea score <sup>2</sup>        | 5.0 (4.0 to 5.0)     | 5.0 (4.0 to 5.0)     | 5.0 (4.0 to 5.0)     | 0.340 |

Data summarised as mean (SD), median (IQR) or N (%) as appropriate.

\*Minimisation factors. BMI=body mass index; LTOT=long term oxygen therapy; AHI=Apnoea Hypopnoea Index; FEV=forced expiratory volume in 1 second; FVC=forced vital capacity; IPAP=inspiratory positive airway pressure; EPAP=expiratory positive airway pressure; PaCO<sub>2</sub>=Arterial partial pressure of carbon dioxide; PaO<sub>2</sub>=Arterial partial pressure of oxygen; SGRQ=St George's Respiratory Questionnaire; SRI=Severe Respiratory Insufficiency Questionnaire.

<sup>†</sup> SGRQ on a 0 to 100 scale where 0 is the best QoL and 100 is the worst.

<sup>††</sup> SRI on a 0 to 100 scale where 100 is the best QoL score and 0 is the worst.

<sup>†††</sup> EQ-5D-5L measures health-related QoL. In the UK values range from a score of -0.594 (worse than death, as measured by the time trade-off method) to 1.000 (full health), with a score of 0.000 representing death.

<sup>1</sup> T-test for difference in means

<sup>2</sup> Mann-Whitney U test

<sup>3</sup> Chi<sup>2</sup> test

eTable 3: Participant retention at follow up over 12-month follow-up period separated by treatment allocation

| Treatment         | Visit     | Number expected | Number attended (%) | Number withdrawn/ died |
|-------------------|-----------|-----------------|---------------------|------------------------|
| HOT HMV<br>(N=57) | 6 weeks   | 54              | 45 (83%)            | 3                      |
|                   | 3 months  | 49              | 40 (82%)            | 8                      |
|                   | 6 months  | 45              | 40 (89%)            | 12                     |
|                   | 12 months | 36              | 36 (100%)           | 21                     |

HOT-HMV HE

Murphy et al

|                               |           |    |           |    |
|-------------------------------|-----------|----|-----------|----|
| <i>HOT</i><br>( <i>N</i> =59) | 6 weeks   | 50 | 37 (74%)  | 9  |
|                               | 3 months  | 43 | 36 (84%)  | 16 |
|                               | 6 months  | 33 | 27 (82%)  | 26 |
|                               | 12 months | 28 | 28 (100%) | 31 |

eTable 4: Cost-effectiveness results for home non-invasive mechanical ventilation (HMV) with home oxygen therapy (HOT) versus HOT alone intention-to-treat and per protocol analysis in US model

| Intervention                                           | Total costs (£)<br>(95%CI)         | Total QALYs         | ICER<br>( $\Delta$ cost/ $\Delta$ QALYs)<br>(95%CI) |
|--------------------------------------------------------|------------------------------------|---------------------|-----------------------------------------------------|
| <b>United States ITT analysis</b>                      |                                    |                     |                                                     |
| Home oxygen therapy alone                              | \$28,368<br>(\$22,149 to \$34,624) | 0.41 (0.33 to 0.49) | Ref                                                 |
| Home non-invasive ventilation with home oxygen therapy | \$24,458<br>(\$18,824 to \$30,092) | 0.49 (0.41 to 0.57) | -\$56,195<br>(-£57,380 to £54,831)                  |
| <b>United States per protocol analysis</b>             |                                    |                     |                                                     |
| Home oxygen therapy alone                              | \$34,563<br>(\$24,994 to \$44,133) | 0.42                | Ref                                                 |
| Home non-invasive ventilation with home oxygen therapy | \$30,550 (\$19,298 to \$41,803)    | 0.49                | Dominant: -<br>\$59,096                             |

Abbreviations: ITT=intention-to-treat; ICER=incremental cost-effectiveness ratio; QALYs=quality-adjusted life years

## References

- Murphy, P.B., et al., *Effect of Home Noninvasive Ventilation With Oxygen Therapy vs Oxygen Therapy Alone on Hospital Readmission or Death After an Acute COPD Exacerbation: A Randomized Clinical Trial*. JAMA, 2017. **317**(21): p. 2177-2186.
- National Institute for Health and Clinical Excellence., *Chronic obstructive pulmonary disease: management of chronic obstructive pulmonary disease in adults in primary and secondary care (partial update)* London: National Clinical Guideline Centre; 2010. Available at: <http://www.nice.org.uk/CG101>.
- Nolan, C.M., et al., *The EQ-5D-5L health status questionnaire in COPD: validity, responsiveness and minimum important difference*. Thorax, 2016. **71**(6): p. 493-500.
- Weinstein, M.C., G. Torrance, and A. McGuire, *QALYs: the basics*. Value Health, 2009. **12** Suppl 1: p. S5-9.
- The Economics Network., *EQ-5D index calculator*. Available at: [http://www.economicnetwork.ac.uk/health/Other\\_resources](http://www.economicnetwork.ac.uk/health/Other_resources).
- EQ-5D Value Sets: Inventory, Comparative Review and User Guide*. . 1 ed. EuroQol Group Monographs. 2007: Springer Netherlands. XI, 91.

HOT-HMV HE

Murphy et al

7. Richardson, G. and A. Manca, *Calculation of quality adjusted life years in the published literature: a review of methodology and transparency*. Health Econ, 2004. **13**(12): p. 1203-10.
8. Thompson, S.G. and J.A. Barber, *How should cost data in pragmatic randomised trials be analysed?* BMJ, 2000. **320**(7243): p. 1197-200.
9. Towse, A., *Should NICE's threshold range for cost per QALY be raised? Yes*. BMJ, 2009. **338**: p. b181.
10. Efron B., *Bootstrap methods: another look at the jackknife*. Ann Statist, 1979. **7**: p. 1-26.
11. Drummond, M.F., et al., *Methods for the Economic Evaluation of Health Care Programmes*. 3 ed. 2005, UK: Oxford University Press.
12. Wedzicha, J.A., et al., *Prevention of COPD exacerbations: a European Respiratory Society/American Thoracic Society guideline*. Eur Respir J, 2017. **50**(3).
13. Seymour, J.M., et al., *Outpatient pulmonary rehabilitation following acute exacerbations of COPD*. Thorax, 2010. **65**(5): p. 423-8.
14. Eaton, T., et al., *Does early pulmonary rehabilitation reduce acute health-care utilization in COPD patients admitted with an exacerbation? A randomized controlled study*. Respirology, 2009. **14**(2): p. 230-8.
15. Duiverman, M.L., et al., *Nocturnal non-invasive ventilation in addition to rehabilitation in hypercapnic patients with COPD*. Thorax, 2008. **63**(12): p. 1052-7.
16. Jones, S.E., et al., *Pulmonary rehabilitation following hospitalisation for acute exacerbation of COPD: referrals, uptake and adherence*. Thorax, 2014. **69**(2): p. 181-2.
17. Yohannes, A.M., R.C. Baldwin, and M.J. Connolly, *Depression and anxiety in elderly outpatients with chronic obstructive pulmonary disease: prevalence, and validation of the BASDEC screening questionnaire*. Int J Geriatr Psychiatry, 2000. **15**(12): p. 1090-6.
18. Heslop-Marshall, K., et al., *Randomised controlled trial of cognitive behavioural therapy in COPD*. ERJ Open Res, 2018. **4**(4).
19. Connors, A.F., Jr., et al., *Outcomes following acute exacerbation of severe chronic obstructive lung disease. The SUPPORT investigators (Study to Understand Prognoses and Preferences for Outcomes and Risks of Treatments)*. Am J Respir Crit Care Med, 1996. **154**(4 Pt 1): p. 959-67.
20. Donaldson, G.C., et al., *Relationship between exacerbation frequency and lung function decline in chronic obstructive pulmonary disease*. Thorax, 2002. **57**(10): p. 847-852.
21. Pitta, F., et al., *Physical activity and hospitalization for exacerbation of COPD*. Chest, 2006. **129**(3): p. 536-44.
22. Mackay, A.J., et al., *Usefulness of the Chronic Obstructive Pulmonary Disease Assessment Test to evaluate severity of COPD exacerbations*. Am J Respir Crit Care Med, 2012. **185**(11): p. 1218-24.
23. Hurst, J.R., et al., *Temporal clustering of exacerbations in chronic obstructive pulmonary disease*. Am J Respir Crit Care Med, 2009. **179**(5): p. 369-74.
24. Echevarria, C., et al., *Home treatment of COPD exacerbation selected by DECAF score: a non-inferiority, randomised controlled trial and economic evaluation*. Thorax, 2018. **73**(8): p. 713-722.
25. Murphy, P.B., et al., *Neural respiratory drive as a physiological biomarker to monitor change during acute exacerbations of COPD*. Thorax, 2011. **66**(7): p. 602-8.
26. Suh, E., et al., *Parasternal muscle electromyography (EMGpara) reflects observed changes in dynamic hyperinflation during acute exacerbations of chronic obstructive pulmonary disease (AECOPD)*. Thorax, 2011. **66**(Suppl 4): p. A53-A54.
27. Rinne, S.T., et al., *Chronic Obstructive Pulmonary Disease Readmissions and Other Measures of Hospital Quality*. Am J Respir Crit Care Med, 2017. **196**(1): p. 47-55.
28. Ospina, M.B., et al., *A systematic review of the effectiveness of discharge care bundles for patients with COPD*. Thorax, 2017. **72**(1): p. 31-39.

HOT-HMV HE

Murphy et al

29. Aboumatar, H., et al., *Effect of a Program Combining Transitional Care and Long-term Self-management Support on Outcomes of Hospitalized Patients With Chronic Obstructive Pulmonary Disease: A Randomized Clinical Trial*. JAMA, 2018. **320**(22): p. 2335-2343.
30. Dixon, P., et al., *Observational Cost-Effectiveness Analysis Using Routine Data: Admission and Discharge Care Bundles for Patients with Chronic Obstructive Pulmonary Disease*. Pharmacoecoon Open, 2020. **4**(4): p. 657-667.
31. Cousse, S., et al., *Efficacy of a home discharge care bundle after acute exacerbation of COPD*. Int J Chron Obstruct Pulmon Dis, 2019. **14**: p. 289-296.
32. Fan, V.S., et al., *A comprehensive care management program to prevent chronic obstructive pulmonary disease hospitalizations: a randomized, controlled trial*. Ann Intern Med, 2012. **156**(10): p. 673-83.
33. Lenferink, A., et al., *Self-management interventions including action plans for exacerbations versus usual care in patients with chronic obstructive pulmonary disease*. Cochrane Database Syst Rev, 2017. **8**: p. CD011682.
34. Greening, N.J., et al., *An early rehabilitation intervention to enhance recovery during hospital admission for an exacerbation of chronic respiratory disease: randomised controlled trial*. BMJ, 2014. **349**: p. g4315.
35. Dyer, F., et al., *Non-invasive ventilation (NIV) as an aid to rehabilitation in acute respiratory disease*. BMC Pulm Med, 2011. **11**: p. 58.
36. Mosher, C.L., et al., *Cost-effectiveness of Pulmonary Rehabilitation Among US Adults With Chronic Obstructive Pulmonary Disease*. JAMA Netw Open, 2022. **5**(6): p. e2218189.
37. Clini, E., et al., *The Italian multicentre study on noninvasive ventilation in chronic obstructive pulmonary disease patients*. Eur Respir J, 2002. **20**(3): p. 529-38.
38. McEvoy, R.D., et al., *Nocturnal non-invasive nasal ventilation in stable hypercapnic COPD: a randomised controlled trial*. Thorax, 2009. **64**(7): p. 561-6.
39. Kohnlein, T., et al., *Non-invasive positive pressure ventilation for the treatment of severe stable chronic obstructive pulmonary disease: a prospective, multicentre, randomised, controlled clinical trial*. Lancet Respir Med, 2014. **2**(9): p. 698-705.
40. Struik, F.M., et al., *Nocturnal noninvasive positive pressure ventilation in stable COPD: a systematic review and individual patient data meta-analysis*. Respiratory Medicine, 2014. **108**(2): p. 329-37.
41. Saatci, E., et al., *Dynamic dead space in face masks used with noninvasive ventilators: a lung model study*. Eur Respir J, 2004. **23**(1): p. 129-35.
42. Rodway, G.W., et al., *Evaluation of sham-CPAP as a placebo in CPAP intervention studies*. Sleep, 2010. **33**(2): p. 260-6.
43. Djavadkhani, Y., et al., *Ethics, consent and blinding: lessons from a placebo/sham controlled CPAP crossover trial*. Thorax, 2015. **70**(3): p. 265-9.
44. Schwartz, S.W., C.R. Cimino, and W.M. Anderson, *CPAP or placebo-effect?* Sleep, 2012. **35**(12): p. 1585-6.
45. *NHS National Tariff Payment System 2016/17. AnnexA: 2016/17 national prices and national tariff workbook*. Available at: <https://www.gov.uk/government/publications/nhs-national-tariff-payment-system-201617>.
46. Secondary Care Analysis NHS Digital, *Hospital adult critical care activity 2015-2016*. Published 23 February 2017. Available at: <http://digital.nhs.uk/catalogue/PUB23426>.
47. Lutman, D. and A.J. Petros, *How many oxygen cylinders do you need to take on transport? A nomogram for cylinder size and duration*. Emerg Med J, 2006. **23**(9): p. 703-4.
48. Aber, W.R., et al., *Consistency of respiratory measurements from night to night during the sleep of elderly men*. Chest, 1989. **96**(4): p. 747-51.



HOT-HMV HE

Murphy et al

49. Personal Social Services Research Unit. *Unit Costs of Health and Social Care 2016*. Available at: <http://www.pssru.ac.uk/project-pages/unit-costs/2016/index.php>.
50. Wedzicha, J.A., et al., *Management of COPD exacerbations: a European Respiratory Society/American Thoracic Society guideline*. Eur Respir J, 2017. **49**(3).
51. NHS, *Amendments to the drug tariff August 2017*. Available at: <https://www.nhsbsa.nhs.uk/sites/default/files/2017-08/August%202017.pdf>.
52. Center for Medicare & Medicaid Services, *Durable Medical Equipment, Prosthetics/Orthotics, and Supplies Fee Schedule 2017*. Available at: <https://www.cms.gov/Medicare/Medicare-Fee-for-Service-Payment/DMEPOSFeeSched/DMEPOS-Fee-Schedule-Items/DME17-A.html?DLPage=1&DLEntries=10&DLSort=2&DLSortDir=descending>. Accessed Oct 2017.
53. Centers for Medicare & Medicaid Services, *Physician Fee Schedule 2017*. Available at: <https://www.cms.gov/Medicare/Medicare-Fee-for-Service-Payment/PhysicianFeeSched/PFS-Relative-Value-Files.html>. Accessed Oct 2017.
54. Definitive Healthcare, *DRG Summary for Medicare Inpatient Prospective Payment Hospitals, FY 2015*. Available at: <https://www.definitivehc.com/>. Accessed Oct 2017.
55. US Bureau of Labor Statistics, *Consumer Price Index Medical care in U.S. city average*. Available at: <https://www.bls.gov/cpi/>. Accessed OCT 2017.
56. Mokhlesi, B., *Obesity hypoventilation syndrome: a state-of-the-art review*. Respir Care, 2010. **55**(10): p. 1347-62; discussion 1363-5.
57. Castro-Anon, O., et al., *Obesity-hypoventilation syndrome: increased risk of death over sleep apnea syndrome*. PLoS One, 2015. **10**(2): p. e0117808.
58. Kapur, V.K., et al., *Clinical Practice Guideline for Diagnostic Testing for Adult Obstructive Sleep Apnea: An American Academy of Sleep Medicine Clinical Practice Guideline*. J Clin Sleep Med, 2017. **13**(3): p. 479-504.
59. Gillissen A, *Exazerbation der chronisch obstruktiven Lungenerkrankung (COPD)*. Ars Medici Dossier, 2007. **11**: p. 23-27.
60. Patil, S.P., et al., *Treatment of Adult Obstructive Sleep Apnea with Positive Airway Pressure: An American Academy of Sleep Medicine Clinical Practice Guideline*. J Clin Sleep Med, 2019. **15**(2): p. 335-343.
61. Pallero, M., et al., *Ambulatory adaptation to noninvasive ventilation in restrictive pulmonary disease: a randomized trial with cost assessment*. Respir Med, 2014. **108**(7): p. 1014-22.
62. McArdle, N., et al., *Continuous positive airway pressure titration for obstructive sleep apnoea: automatic versus manual titration*. Thorax, 2010. **65**(7): p. 606-11.
63. Noble, P.B., et al., *Airway narrowing assessed by anatomical optical coherence tomography in vitro: dynamic airway wall morphology and function*. J Appl Physiol (1985), 2010. **108**(2): p. 401-11.
64. McArdle, N., et al., *Treating Chronic Hypoventilation With Automatic Adjustable Versus Fixed EPAP Intelligent Volume-Assured Positive Airway Pressure Support (iVAPS): A Randomized Controlled Trial*. Sleep, 2017. **40**(10).
65. Orr, J.E., et al., *Automatic EPAP intelligent volume-assured pressure support is effective in patients with chronic respiratory failure: A randomized trial*. Respirology, 2019.
66. Hardinge, M., et al., *Guideline update: The British Thoracic Society Guidelines on home oxygen use in adults*. Thorax, 2015. **70**(6): p. 589-91.
67. Hardinge, M., et al., *British Thoracic Society guidelines for home oxygen use in adults*. Thorax, 2015. **70 Suppl 1**: p. i1-43.
68. Mandal, S., et al., *A cohort study to identify simple clinical tests for chronic respiratory failure in obese patients with sleep-disordered breathing*. BMJ Open Respir Res, 2014. **1**(1): p. e000022.

HOT-HMV HE

Murphy et al

69. Mandal, S., et al., *Medium-term cost-effectiveness of an automated non-invasive ventilation outpatient set-up versus a standard fixed level non-invasive ventilation inpatient set-up in obese patients with chronic respiratory failure: a protocol description*. *BMJ Open*, 2015. **5**(4): p. e007082.
